# Supplementary material for: Emulsion Liquid Membranes Based on Os–NP/n–Decanol or n–Dodecanol Nanodispersions for p–Nitrophenol Reduction
Source: MDPI journal article supplement (doi:10.3390/molecules29081842), 2024-04-18
Supplement: s1 [file s1]

## Supplementary Material

**Table S1.** The characteristics of the substances used for the emulsion liquid membrane preparation.

| Component           | Chemical formula                                                                    | Molar mass (g/mol) | Density (g/cm <sup>3</sup> ) | pKa                       | Solubility in water (g/L) | $\lambda$ (nm)                  |
|---------------------|-------------------------------------------------------------------------------------|--------------------|------------------------------|---------------------------|---------------------------|---------------------------------|
| Osmium tetroxide    | OsO <sub>4</sub>                                                                    | 254.23             | 4.91                         | -                         | soluble                   | -                               |
| Sodium borohydride  | Na BH <sub>4</sub>                                                                  | 37.83              | 1.07                         | alkaline aqueous solution | soluble                   | -                               |
| t-butyl alcohol     | 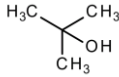   | 74.12              | 0.775                        | 16.54                     | miscible                  | -                               |
| p-Nitrophenol (pNP) |    | 139.17             | 1.48                         | 7.1                       | 16.0                      | 317 (phenol)<br>404 (phenolate) |
| p-Aminophenol (pAP) |   | 109.13             | 1.13                         | 5.5<br>10.3               | 15.0                      | 317                             |
| n-decanol (nD)      |  | 158.28             | 0.830                        | 15.21                     | 0.037                     | 197                             |
| n-dodecanol (nDD)   |  | 186.34             | 0.8831                       | 16.84                     | 0.004                     | 201                             |
| 10-undecylenic acid |  | 184.28             | 0.912                        | 5.02                      | 0.074                     | -                               |

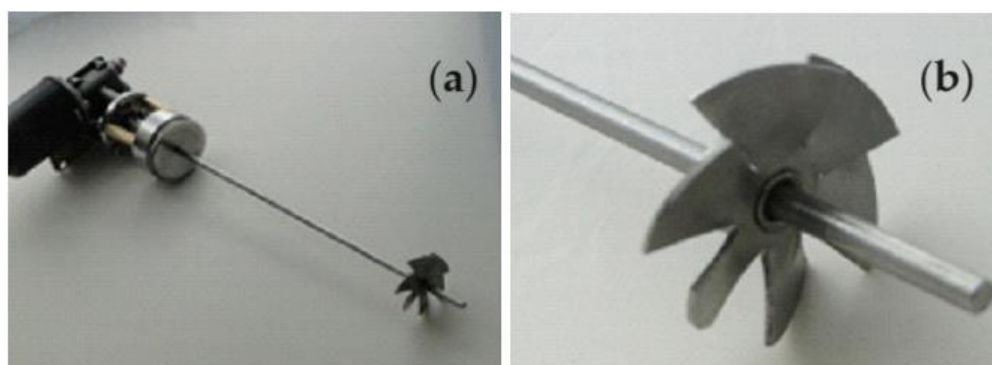

**Figure S1.** Helix propeller stirrer for dispersing osmium nanoparticles in n-alcohols: (a) overview; (b) detail of the stirring component.

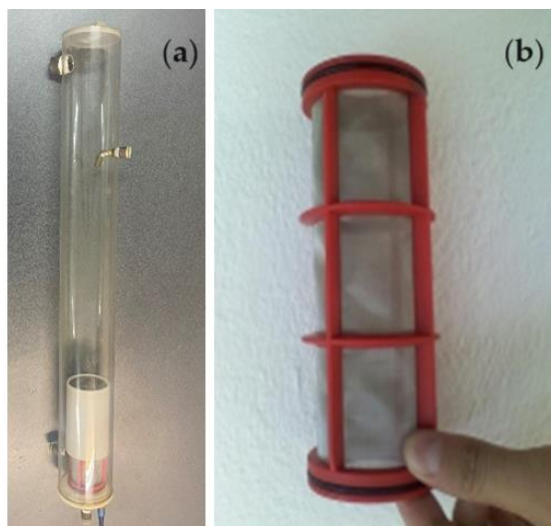

**Figure S2.** The p-nitrophenol reduction reaction column (a); and the detail of the emulsion (b).
